# Supplementary material for: The influence of a dicationic surfactant on the aggregation process of the IVAGVN peptide derived from the human cystatin C sequence (56–61)
Source: Royal Society of Chemistry journal article supplement (doi:10.1039/d4ra08377f), 2025-01-01
Supplement: d4ra08377f1.pdf [file d4ra08377f1.pdf]

## The influence of dicationic surfactant on the aggregation process of the IVAGVN peptide from human cystatin C sequence (56-61)

Julia Ludwiczak<sup>a</sup>, Emilia Iłowska<sup>b\*</sup>, Michalina Wilkowska<sup>a</sup>, Aneta Szymańska<sup>c</sup>, Marek Kempka<sup>a</sup>, Maria Dobies<sup>a</sup>, Kosma Szutkowski<sup>d</sup>, Maciej Kozak<sup>a</sup>

<sup>a</sup> Department of Biomedical Physics, Adam Mickiewicz University, Poznan, Poland.

<sup>b</sup> Department of Organic Chemistry, University of Gdansk, Gdansk, Poland. [emilia.ilowska@ug.edu.pl](mailto:emilia.ilowska@ug.edu.pl)

<sup>c</sup> Department of Biomedical Chemistry, University of Gdansk, Gdansk, Poland.

<sup>d</sup> NanoBiomedical Centre, Adam Mickiewicz University, Poznan, Poland.

\* Corresponding author: [emilia.ilowska@ug.edu.pl](mailto:emilia.ilowska@ug.edu.pl)

|                                                                                                                                                                                                                                                                                                                                                                |    |
|----------------------------------------------------------------------------------------------------------------------------------------------------------------------------------------------------------------------------------------------------------------------------------------------------------------------------------------------------------------|----|
| <b>Table S1.</b> Contribution [%] of secondary structure elements determined from CD spectra for different peptide concentrations [mM]. .....                                                                                                                                                                                                                  | 2  |
| <b>Table S2.</b> Contribution [%] of secondary structure elements determined from CD spectra for different peptide concentrations: 0.52 and 5.25 mM and with C6IMIC12 surfactant with various concentrations (0.25, 1.00 and 4.00 mM). .....                                                                                                                   | 3  |
| <b>Figure S1.</b> A) The mean-square displacement (MSD) analysis for the 0-80 ns interval and B) the decomposition of MSD into its matrix components ( $MSD_{xx}$ , $MSD_{yy}$ , $MSD_{zz}$ , $MSD_{xy}$ , $MSD_{xz}$ , $MSD_{yz}$ ), diffusion tensor, diffusion tensor eigenvalues ( $l_1$ , $l_2$ , $l_3$ ) and resulting mean diffusion coefficients. .... | 4  |
| <b>Figure S2.</b> DOSY <sup>1</sup> H NMR spectra for diffusion coefficient measurements of the peptide IVAGVN at various concentrations: 0.52 mM; 1.05 mM, 1.75 mM. 3.50 mM and 5.25 mM. ....                                                                                                                                                                 | 7  |
| <b>Figure S3.</b> DOSY <sup>1</sup> H NMR spectra for diffusion coefficient measurements of the peptide IVAGVN (0.52 mM) with the presence of different surfactant concentrations: 0 mM, 0.25 mM, 1.00 mM, 2.00 mM and 4.00 mM. ....                                                                                                                           | 10 |

**Table S1.** Contribution [%] of secondary structure elements determined from CD spectra for different peptide concentrations [mM].

| C <sub>IVAGVN</sub> [mM] | $\alpha$ -helix [%] | $\beta$ -sheets [%] | Turns [%] | Unordered [%] |
|--------------------------|---------------------|---------------------|-----------|---------------|
| 0.52                     | 7.8                 | 23.5                | 16.6      | 52.1          |
| 1.05                     | 9.3                 | 17.9                | 17.8      | 55            |
| 2.60                     | 16.4                | 22.8                | 16.4      | 44.5          |
| 3.50                     | 14.9                | 23.2                | 16        | 45.9          |
| 5.25                     | 9.4                 | 24.3                | 18.3      | 48.1          |

**Table S2.** Contribution [%] of secondary structure elements determined from CD spectra for different peptide concentrations: 0.52 and 5.25 mM and with C6IMIC12 surfactant with various concentrations (0.25, 1.00 and 4.00 mM).

| C <sub>IVAGVN</sub> [mM] | C <sub>surfactant</sub> [mM] | $\alpha$ -helix [%] | $\beta$ -sheets [%] | Turns [%] | Unordered [%] |
|--------------------------|------------------------------|---------------------|---------------------|-----------|---------------|
| 0.52                     | 0                            | 7.8                 | 23.5                | 16.6      | 52.1          |
|                          | 0.25                         | 4.5                 | 29.3                | 19.0      | 47.2          |
|                          | 1.00                         | 7.9                 | 27.4                | 16.1      | 48.9          |
|                          | 4.00                         | 0                   | 47.2                | 23.2      | 29.3          |
| 5.25                     | 0                            | 9.4                 | 24.3                | 18.3      | 48.1          |
|                          | 0.25                         | 15.2                | 25.8                | 14.6      | 44.4          |
|                          | 1.00                         | 7.5                 | 32.8                | 15.3      | 44.4          |
|                          | 4.00                         | 7.1                 | 31.0                | 20.7      | 41.2          |

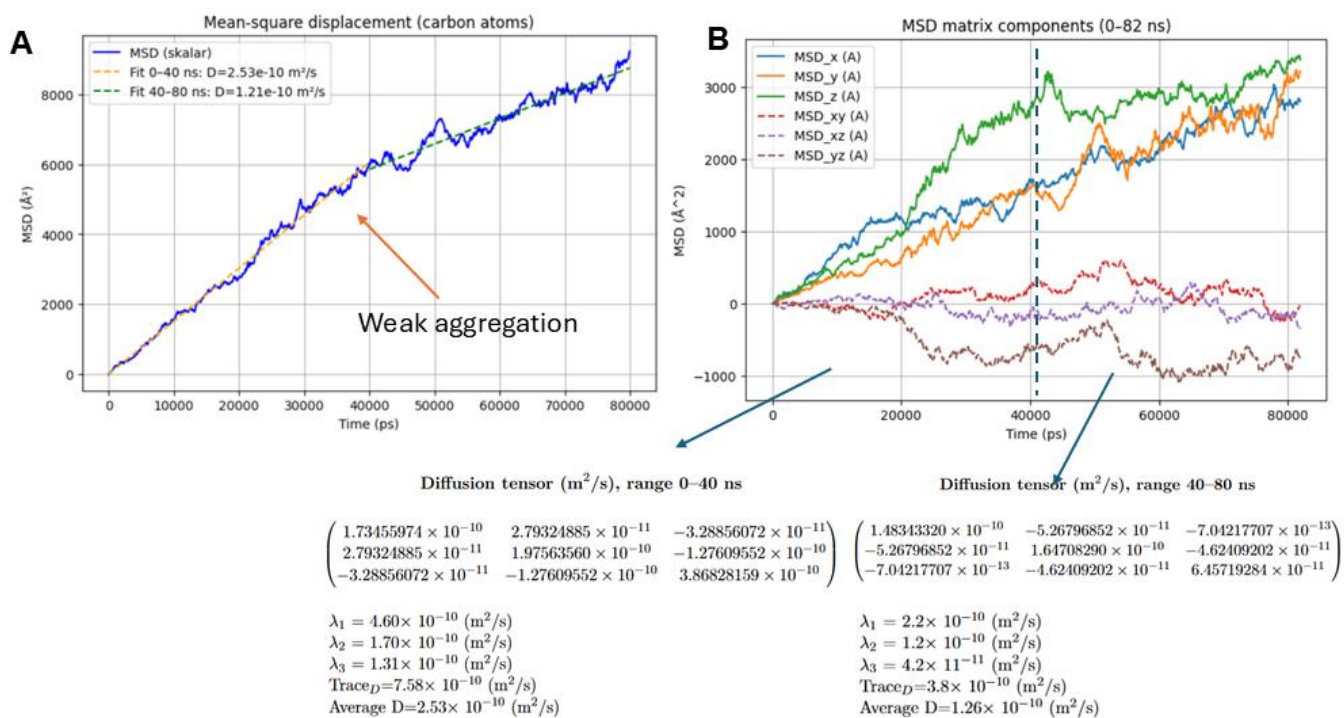

**Figure S1.** A) The mean-square displacement (MSD) analysis for the 0-80 ns interval and B) the decomposition of MSD into its matrix components ( $\text{MSD}_{xx}$ ,  $\text{MSD}_{yy}$ ,  $\text{MSD}_{zz}$ ,  $\text{MSD}_{xy}$ ,  $\text{MSD}_{xz}$ ,  $\text{MSD}_{yz}$ ), diffusion tensor, diffusion tensor eigenvalues ( $\lambda_1$ ,  $\lambda_2$ ,  $\lambda_3$ ) and resulting mean diffusion coefficients.

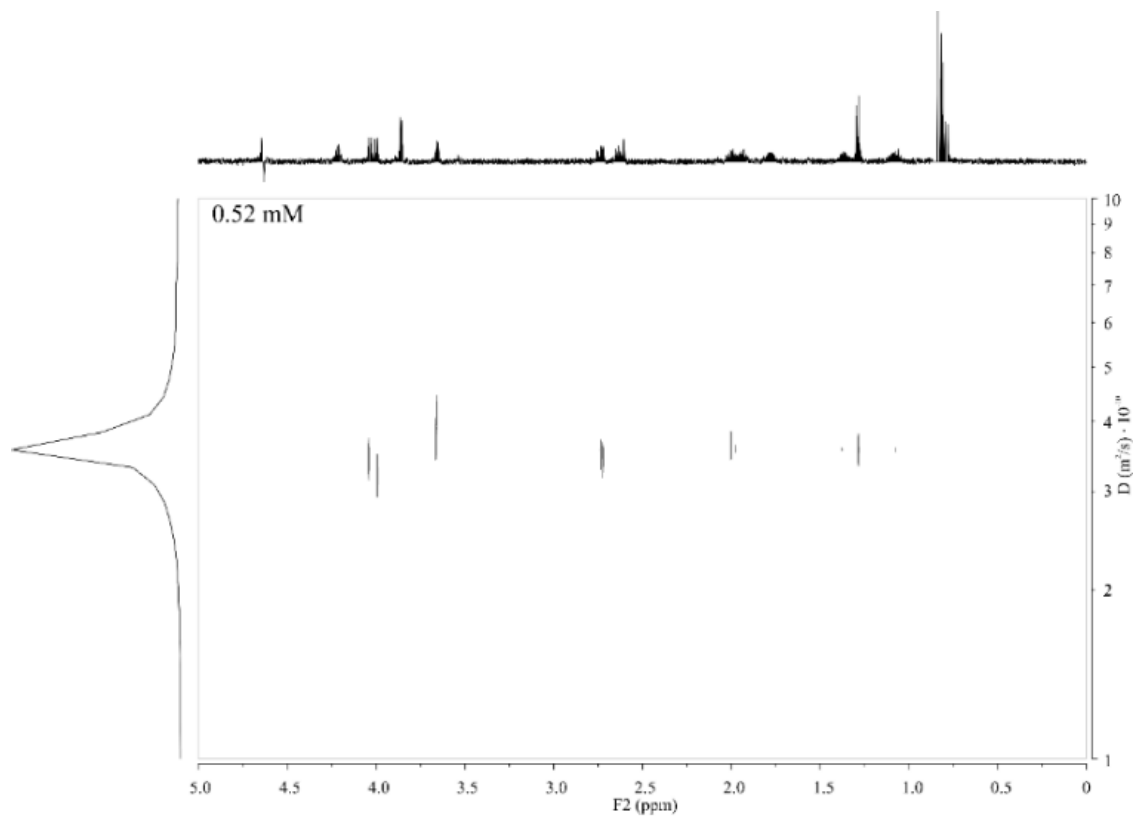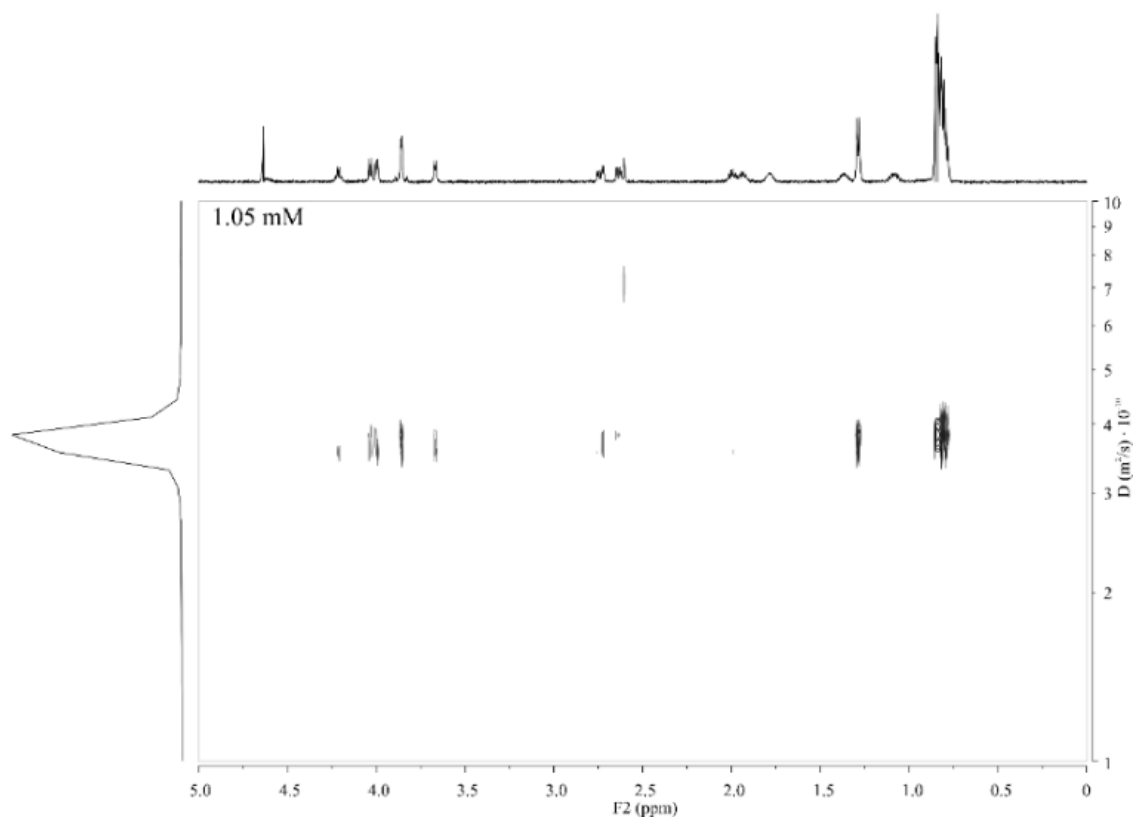

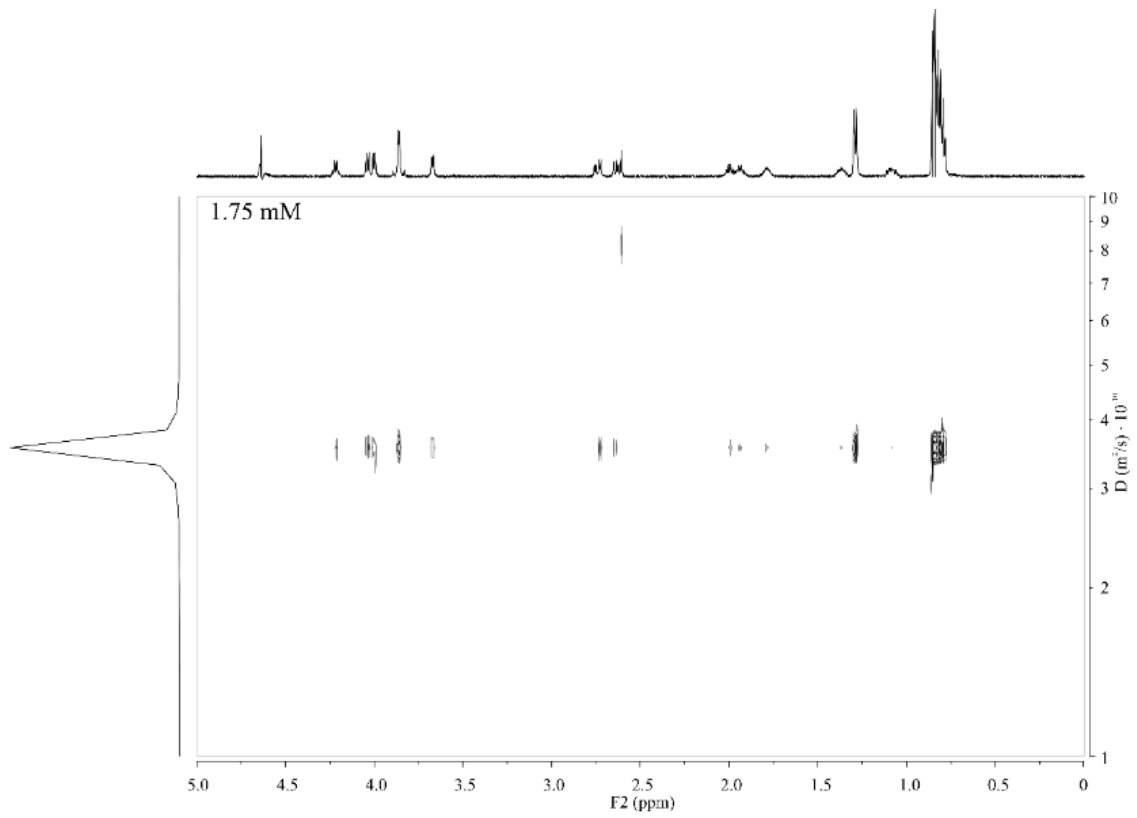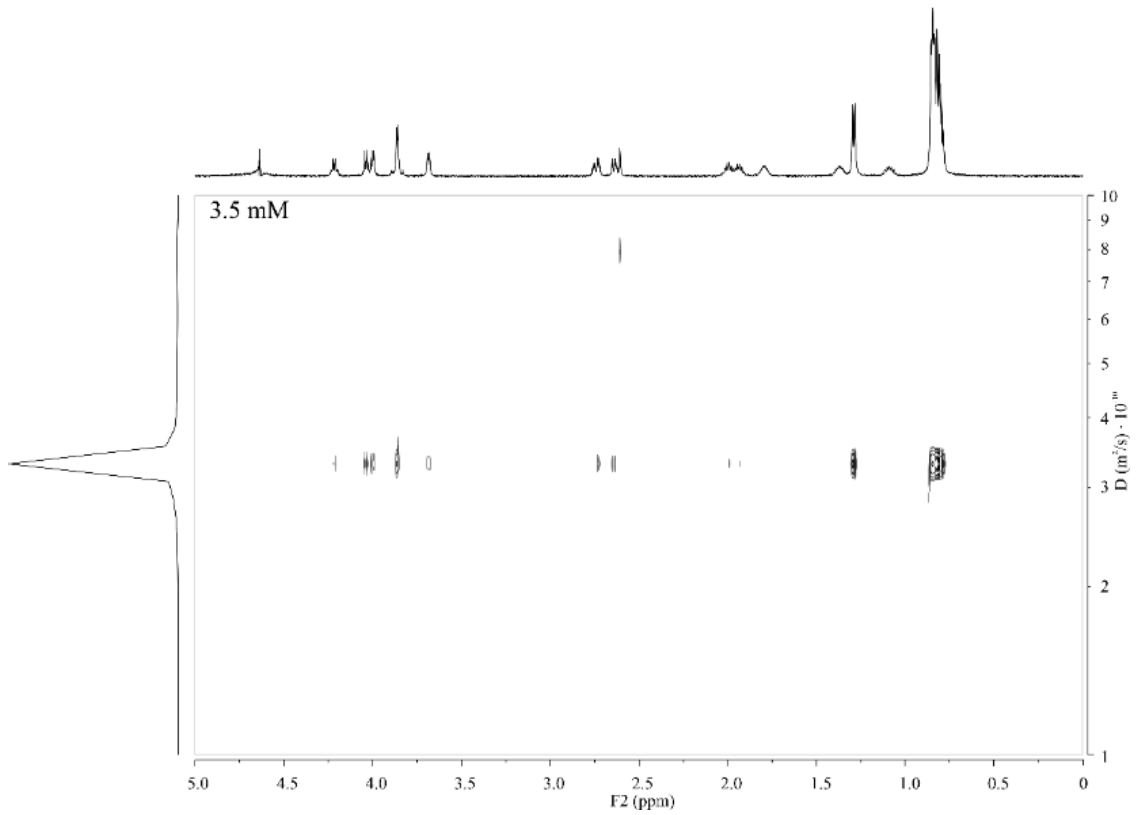

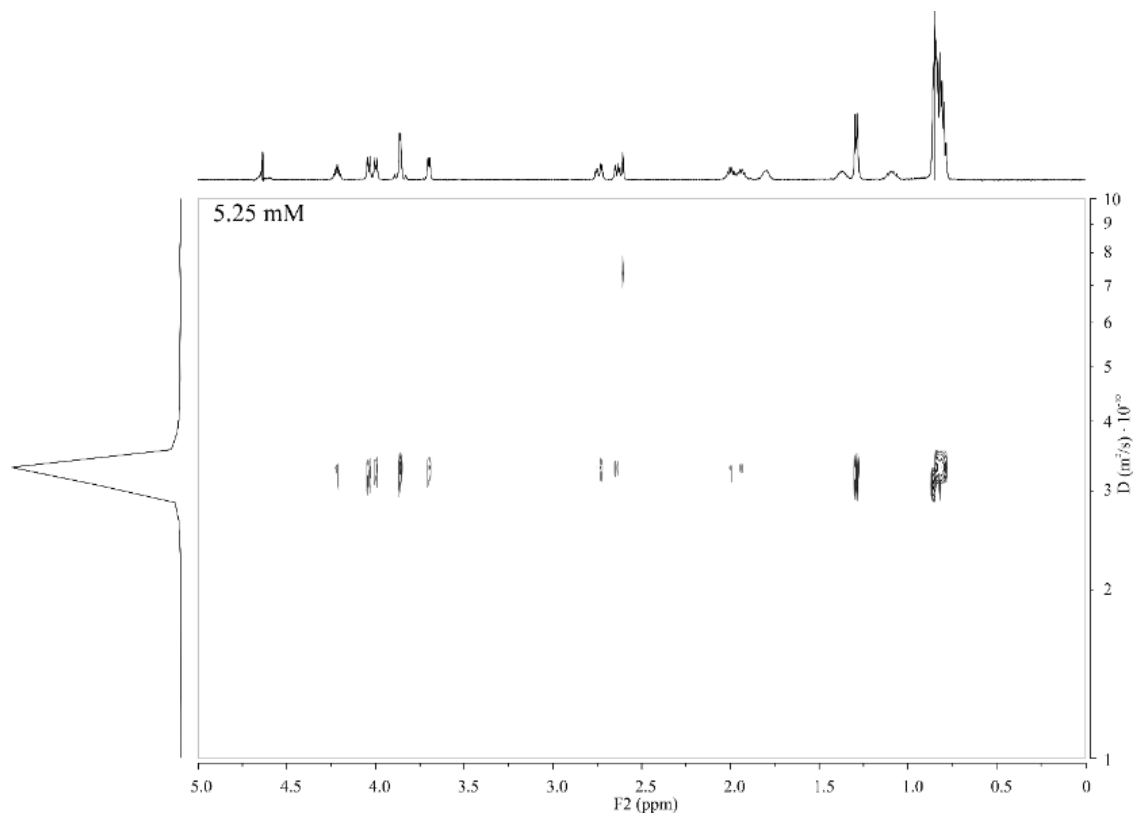

**Figure S2.** DOSY  $^1\text{H}$  NMR spectra for diffusion coefficient measurements of the peptide IVAGVN at various concentrations: 0.52 mM; 1.05 mM, 1.75 mM. 3.50 mM and 5.25 mM.

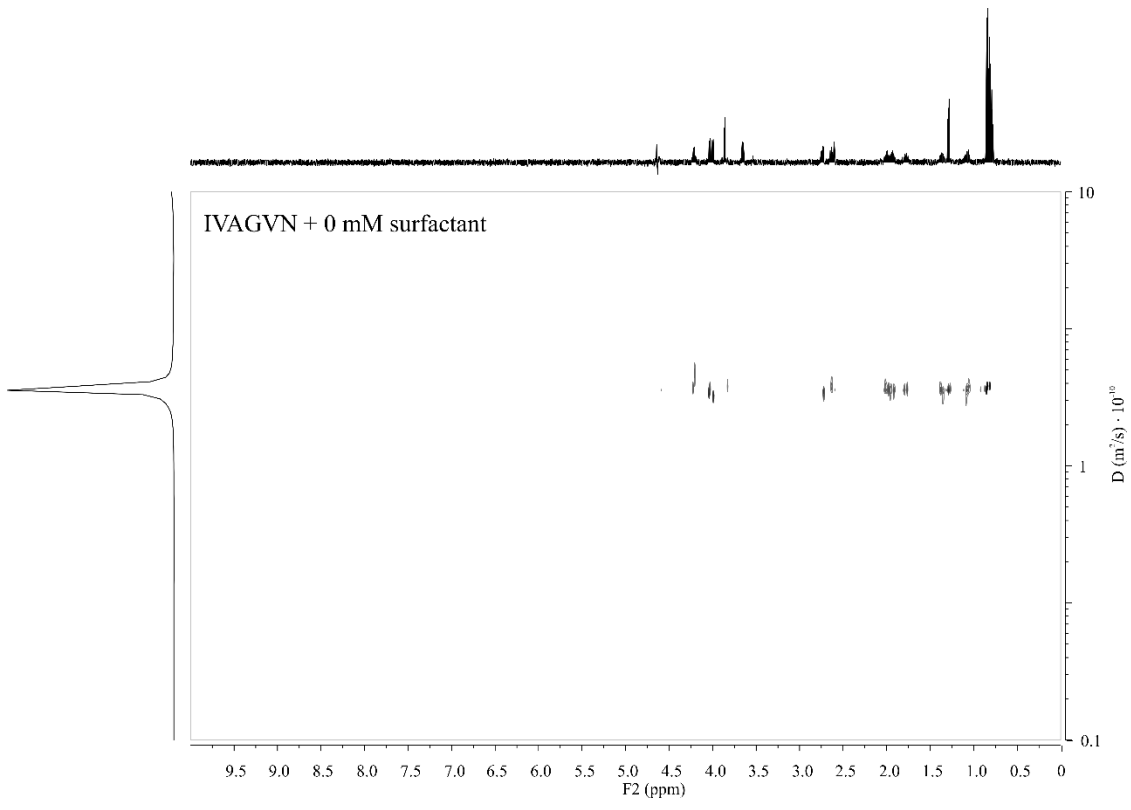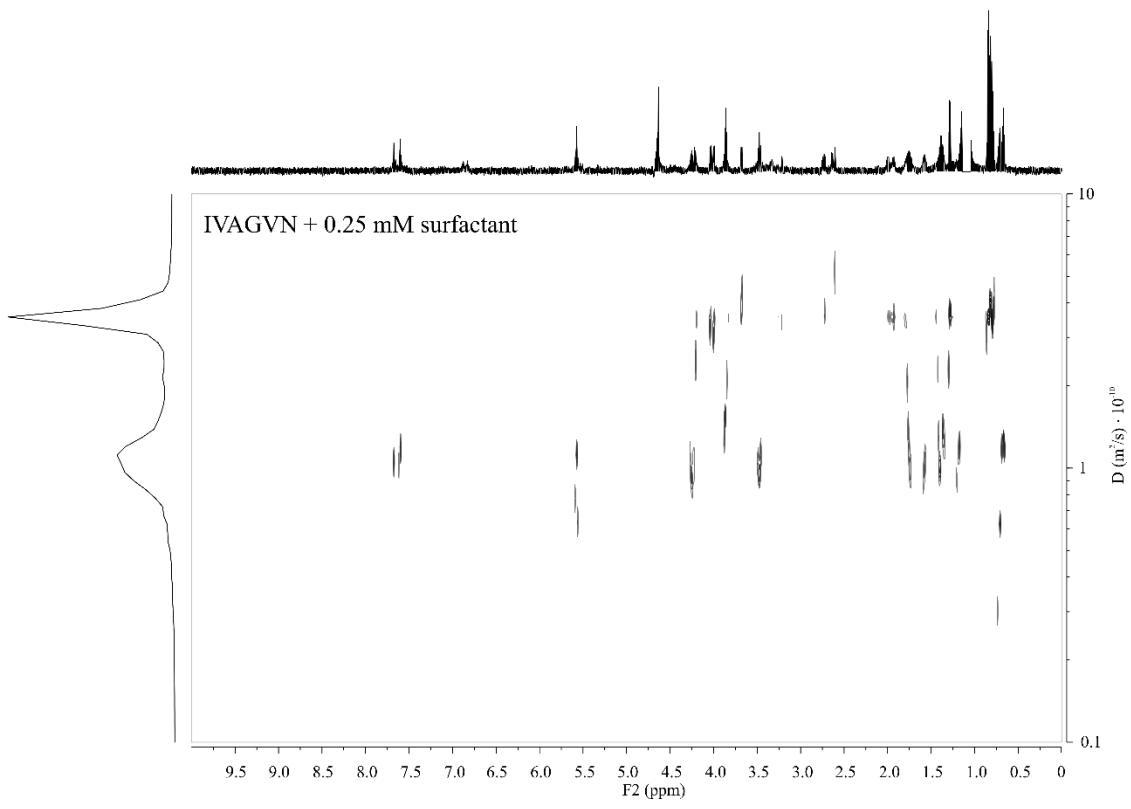



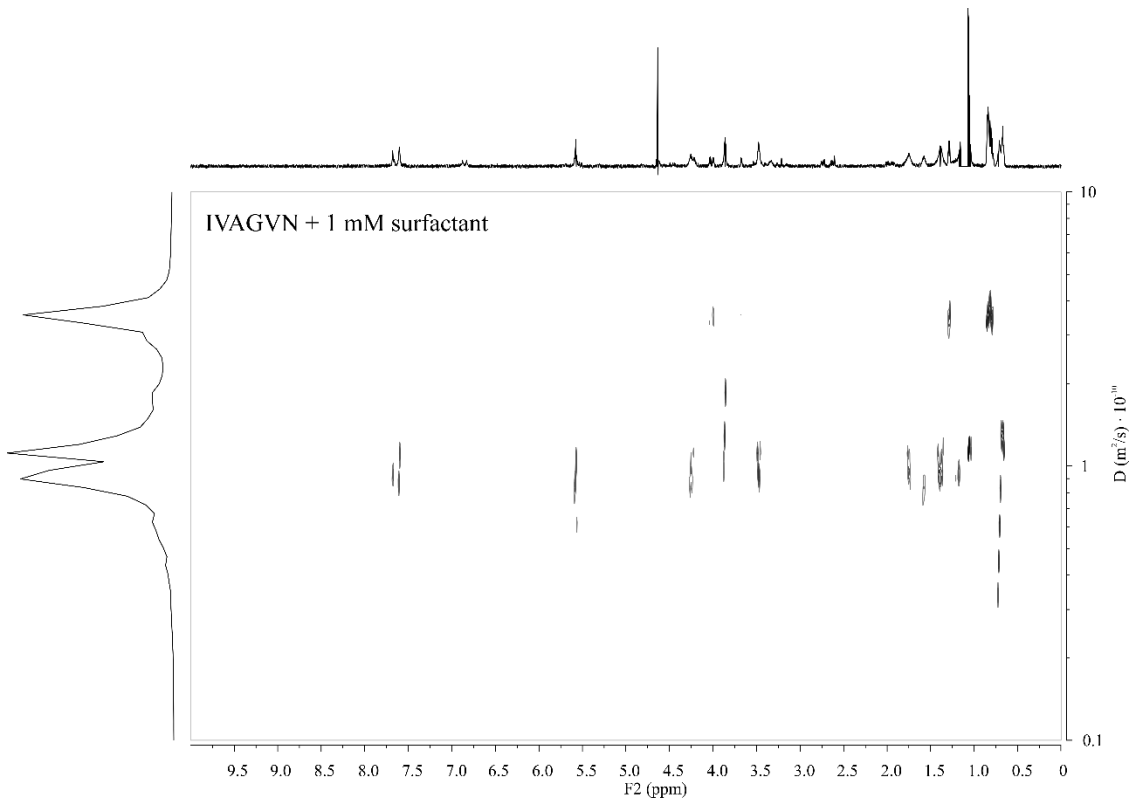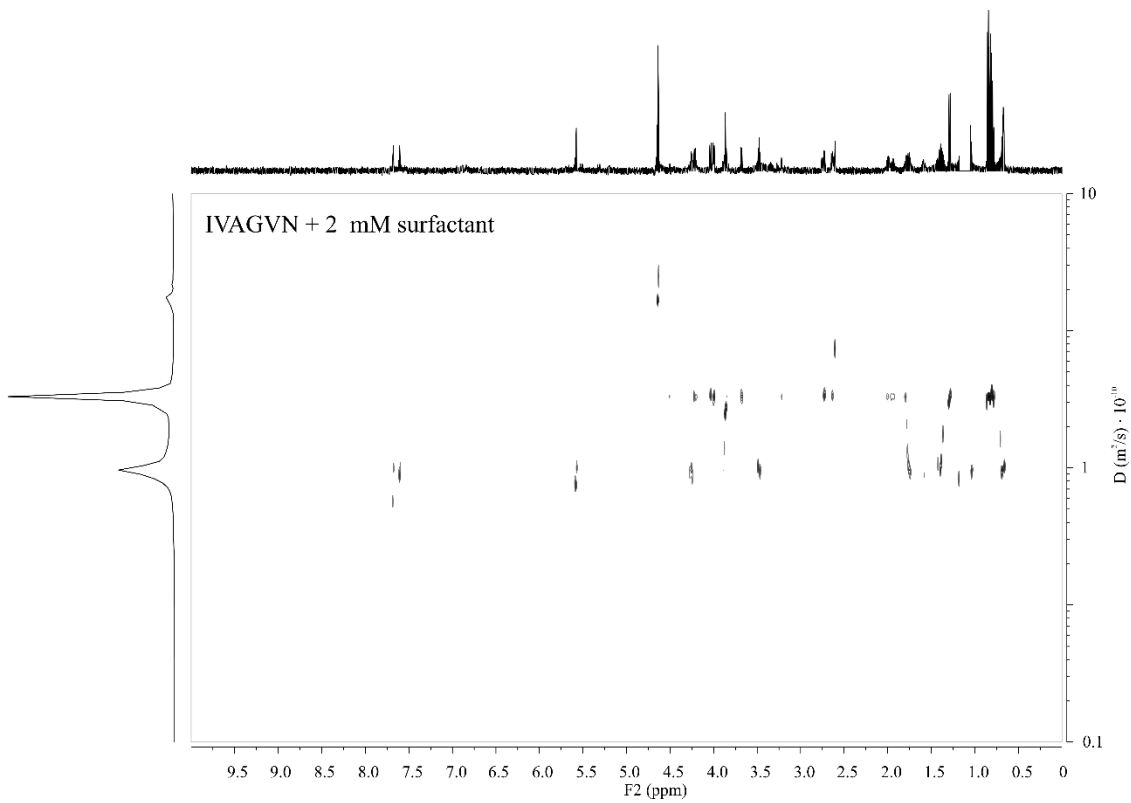

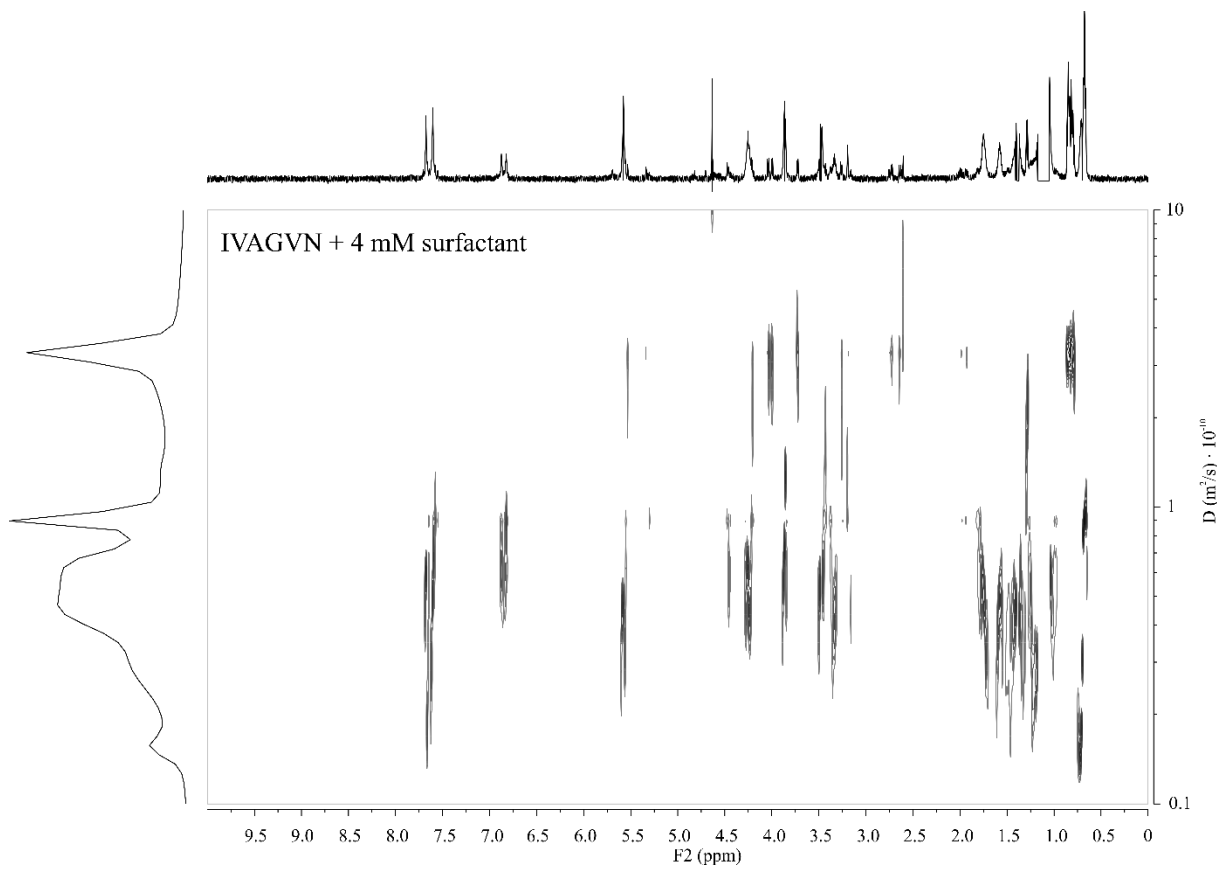

**Figure S3.** DOSY <sup>1</sup>H NMR spectra for diffusion coefficient measurements of the peptide IVAGVN (0.52 mM) with the presence of different surfactant concentrations: 0 mM, 0.25 mM, 1.00 mM, 2.00 mM and 4.00 mM.
